# Supplementary material for: β3-Adrenergic receptors regulate human brown/beige adipocyte lipolysis and thermogenesis
Source: JCI journal article supplement (doi:10.1172/jci.insight.139160), 2021-06-08
Supplement: sd1 [file 1]

**Supplemental Information**

**$\beta$ 3-adrenergic receptors regulate human brown/beige adipocyte lipolysis and thermogenesis**

Cheryl Cero<sup>1</sup>, Hannah J. Lea<sup>1</sup>, Kenneth Y. Zhu<sup>1</sup>, Farnaz Shamsi<sup>2</sup>, Yu-Hua Tseng<sup>2</sup>,  
Aaron M. Cypess<sup>1,\*</sup>

<sup>1</sup>Diabetes, Endocrinology, and Obesity Branch, NIDDK, NIH, Bethesda, MD

<sup>2</sup>Section on Integrative Physiology and Metabolism, Joslin Diabetes Center, Harvard  
Medical School, Boston, MA

\*Correspondence: [aaron.cypess@nih.gov](mailto:aaron.cypess@nih.gov)

**Contents: Supplemental Figures = 7; Supplemental Tables = 4**

## **Supplemental Figures Titles and Legends**

**Supplemental Figure 1. Genetic and phenotypic profile of human supraclavicular primary pre-and differentiated adipocytes.** (A-C) Gene and protein expression of UCP1 in superficial neck (WAT) and supraclavicular (BAT) adipose tissue (n=1) (A); gene expression of brown/beige adipocyte markers (B) and adrenergic receptors (C) in WAT and BAT tissues. (D-F) Differentiation protocol and differentiation progression of primary human brown/beige adipocytes (D); gene expression of *PPARGC1A*, *UCP1* and *MT-CO2* (E) and protein expression of UCP1, TOM20 and Actin (F) over differentiation. (G-J) qPCR of late markers of differentiation (G); brown/beige adipocyte markers (H); fatty acid oxidation genes (I); and beta-adrenergic receptors (J) in pre- and mature primary supraclavicular adipocytes. Gene expression data are normalized to pre-adipocytes and expressed as mean  $\pm$  SEM on a Log 10 scale. Data are analyzed by 2-tailed unpaired Student's t-test and a One-way ANOVA with \*P<0.05, \*\*P<0.01, \*\*\*P<0.001, \*\*\*\*P<0.0001.

**Supplemental Figure 2. Silencing *ADRB3* in mature brown/beige adipocytes lowers UCP1 protein content but does not compromise lipid accumulation.** (A-C) Immunofluorescence of differentiated adipocytes staining for mitochondria (Mitotracker, red), lipid droplets (LipidTox-green), anti-UCP1 (white) and nuclei (Dapi, blu) in untreated siRNA (A); siRNA-Ctrl (B) and siRNA-*ADRB3* (C) adipocytes. Scale bars: 100  $\mu$ m for all images. (D) Quantification of LipidTox positive adipocytes in untreated, siRNA-Ctrl and siRNA-*ADRB3* adipocytes. Data are the mean of five sections analyzed by One-way ANOVA.

**Supplemental Figure 3. Silencing *ADRB3* in mature brown/beige adipocytes does not compromise beige/brown adipocyte identity and ETC genes and proteins.** (A) qRT-PCR analysis of human brown/beige adipocyte markers (B-C) mRNA expression of nuclear encoded electron transport chain genes (B) and proteins (C) in siRNA Ctrl and siRNA-*ADRB3* adipocytes. Gene expression data are normalized to siRNA-Ctrl adipocytes and expressed as mean  $\pm$  SEM on a Log 10 scale. Data are analyzed by 2-tailed unpaired Student's t-test with \*P<0.05, \*\*P<0.01, \*\*\*P<0.001, \*\*\*\*P<0.0001.

**Supplemental Figure 4. Activation of all three beta-adrenergic subtypes in primary human brown/beige adipocytes stimulates lipolysis and can be suppressed by**

**pre-treatment of the  $\beta_3$ -AR antagonist L-748,337.** (A) Basal, beta-agonists, and iso (10  $\mu$ M) stimulated lipolysis with and without pre-treatment of propranolol (10  $\mu$ M) and  $\beta_3$ -AR antagonist L-748,337 (10  $\mu$ M). Data are represented as mean  $\pm$  SEM. 2-way ANOVA was used for statistical analysis. \* when comparing basal to beta agonist stimulated lipolysis; # when comparing beta-agonist stimulation to propranolol; \$ when comparing beta-agonist stimulation to L-748,337 pre-treatment. \*P<0.05; \*\*P<0.01; \*\*\*P<0.001; \*\*\*\*P<0.0001.

**Supplemental Figure 5. Silencing *ADRB3* in mature brown/beige adipocytes lowers non-mitochondrial respiration.** (A-B) Non-mitochondrial respiration of differentiated siRNA-Ctrl and siRNA-*ADRB3* transfected adipocytes without ligand stimulated OCR (A) and Fsk-stimulated OCR (B). (C) mRNA expression of human genes encoding and glucose transporters 1 (*SLC2A1*) and 4 (*SLC2A4*) in transfected adipocytes. Gene expression data are normalized to siRNA-Ctrl adipocytes and expressed as mean  $\pm$  SEM on a Log 10 scale.

**Supplemental Figure 6. Phenotype of immortalized human brown/beige adipocytes.** (A) Representative microscopic pictures of the morphology of undifferentiated and differentiated immortalized brown adipocytes. (B) Oil Red O staining of differentiated adipocytes at passage number 18 (P18). (C-D) qPCR of late markers of differentiation (C); brown/beige adipocyte markers in pre- and mature adipocytes (D). (E) Protein expression of FABP4, adiponectin and UCP1 at P18 in pre- and mature adipocytes. (F-G) Gene expression of the mitochondrial encoded gene MT-CO2 (F); beta-adrenergic receptors (G) in undifferentiated and differentiated immortalized brown adipocytes. (H) Gene expression of beta-adrenergic receptors and UCP1 in pre-adipocytes and mature adipocytes of primary and immortalized brown/beige adipocytes. PCR data are normalized to pre-adipocytes and expressed as mean  $\pm$  SEM on a Log 10 scale, except for data in (H) that is not normalized. Data are analyzed by 2-tailed unpaired Student's t-test. \*P<0.05; \*\*P<0.01; \*\*\*P<0.001; \*\*\*\*P<0.0001.

**Supplemental Figure 7. Silencing *ADRB3* in immortalized human brown adipocytes lowers the cellular lipogenic and thermogenic machinery.** (A-G) mRNA expression profiles of beta-adrenergic receptor genes (A); thermogenic related genes (B); fatty acid synthesis genes (C); fatty acid oxidation genes (D); mtDNA encoded

genes (E); glucose transporters (F); and lipogenic genes (G) in 48h transfected siRNA-Ctrl and siRNA-*ADRB3* immortalized adipocytes. (H-I) Basal and Fsk (10  $\mu$ M) stimulated cAMP concentration (H) and western blot of PKA substrates in basal and Fsk 10  $\mu$ M stimulated transfected adipocytes (I). (J-K) Basal and Fsk (10  $\mu$ M) stimulated glycerol release (J) and protein expression of pHSL563; pHSL660; HSL; ATGL and actin in siRNA-Ctrl and siRNA-*ADRB3* adipocytes following treatment. (L-N) OCR by differentiated cells treated in immortalized siRNA-Ctrl (black); siRNA-*ADRB1* (gray) and siRNA-*ADRB3* (red) transfected adipocytes (L); quantification of basal respiration (M) and metabolic profile (N) by transfected immortalized adipocytes. Data are expressed as mean  $\pm$  SEM. Gene expression data are normalized to siRNA-Ctrl adipocytes, expressed on a Log 10 scale and analyzed by 2-tailed unpaired Student's t-test. OCR data are analyzed by one-way ANOVA. cAMP and lipolysis data are analyzed by 2-way ANOVA with \* when comparing basal vs stimulated in siRNA-Ctrl; \$ when comparing basal to stimulated in siRNA-*ADRB3* adipocytes; # when comparing same doses between siRNA-Ctrl and siRNA-*ADRB3* adipocytes. \*P<0.05; \*\*P<0.01; \*\*\*P<0.001; \*\*\*\*P<0.0001.

**Supplemental Table 1. List of genes and sequences of the primers used for RT-PCR gene expression analysis.**

**Supplemental Table 2. Ct values of genes investigated in the main figures 1, 2 and 5.**

**Supplemental Table 3. Ct values of genes investigated in the supplemental figure 1.**

**Supplemental Table 3. Ct values of genes investigated in the supplemental figures 2,4 and 5.**

**Supplemental Figure 1. Genetic and phenotypic profile of human supraclavicular primary pre-and differentiated adipocytes.**

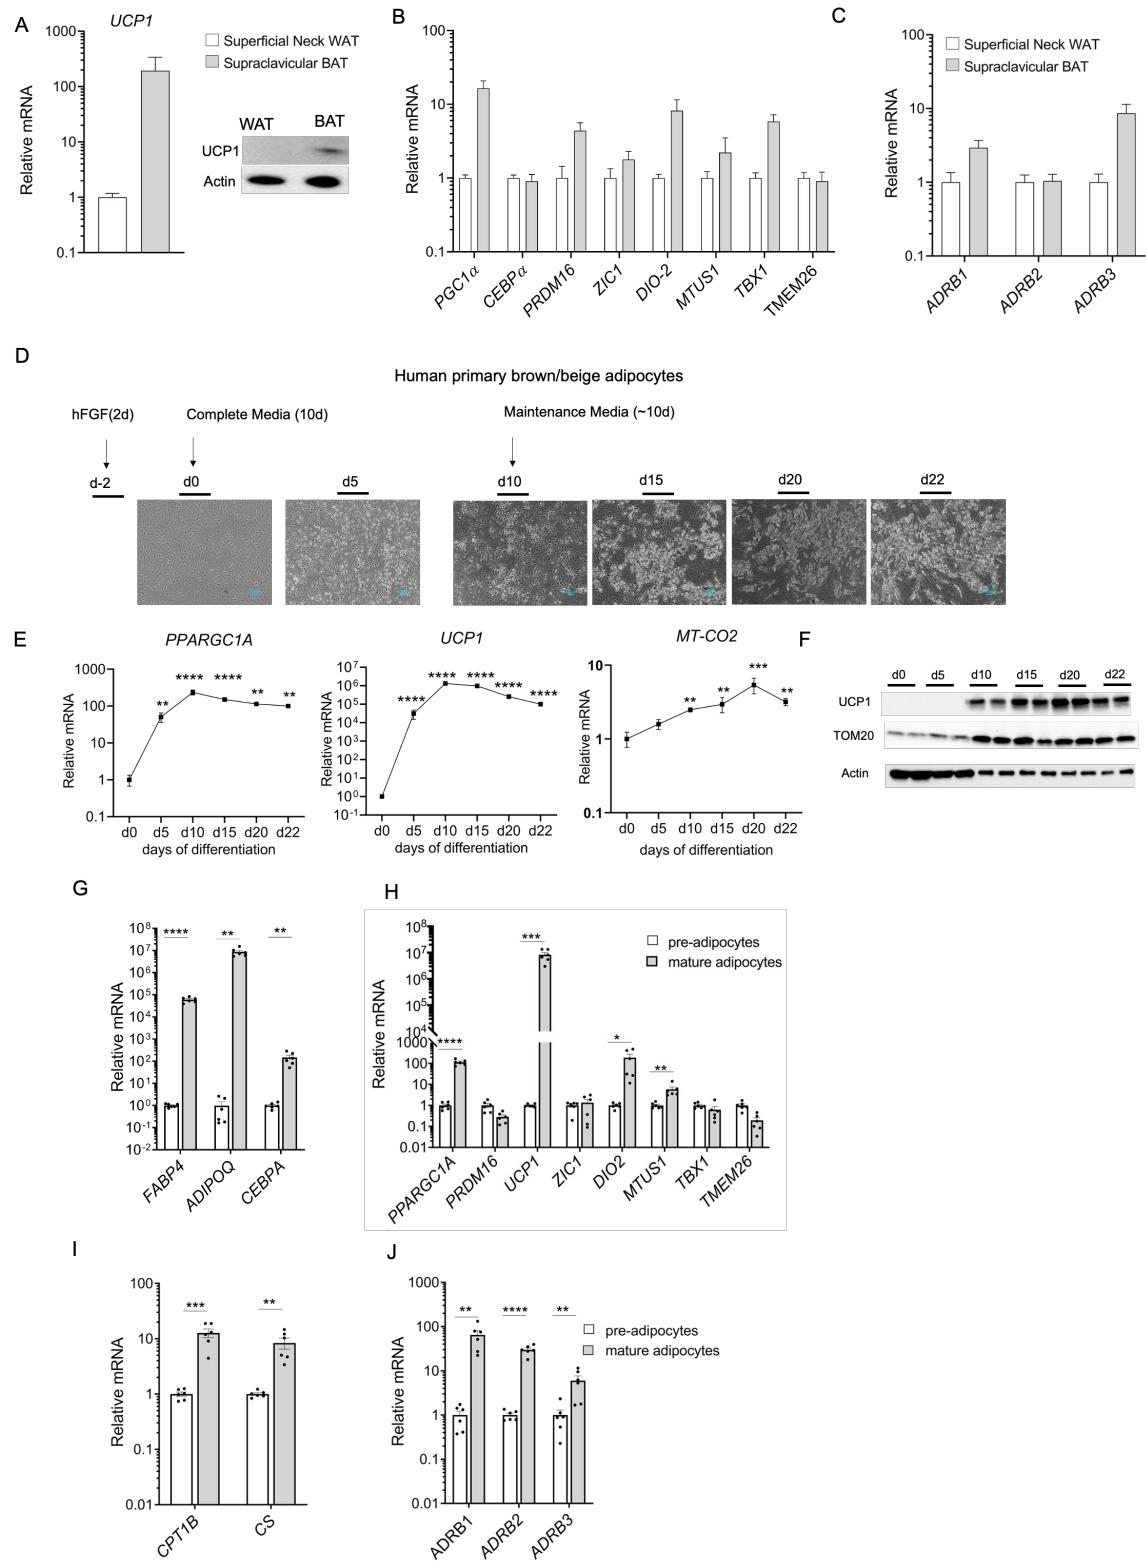

**Supplemental Figure 2. Silencing *ADRB3* in mature brown/beige adipocytes lowers UCP1 protein content but does not compromise lipid accumulation.**

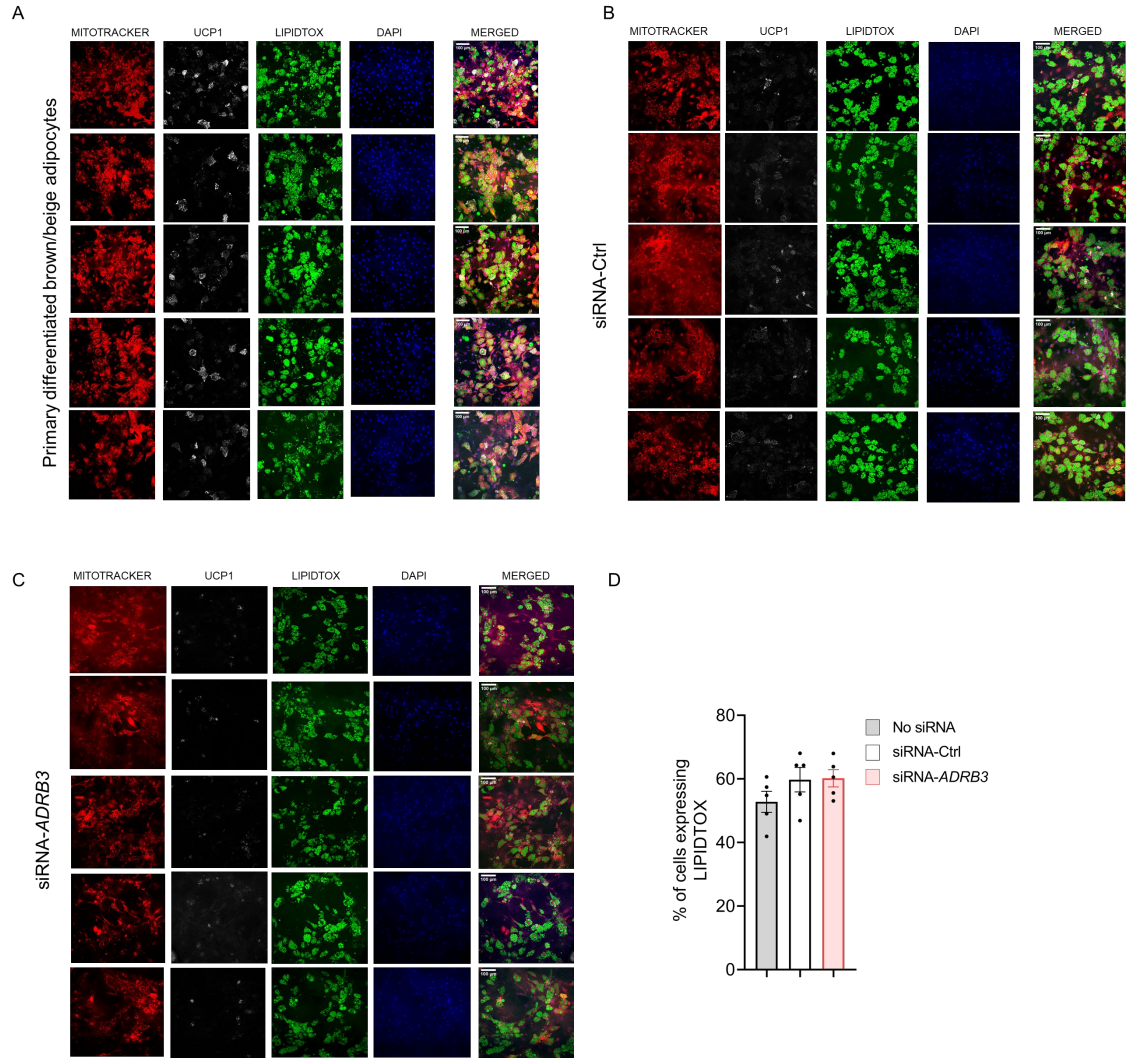

**Supplemental Figure 3. Silencing *ADRB3* in mature brown/beige adipocytes does not compromise beige/brown adipocyte identity and ETC genes and proteins.**

**A**

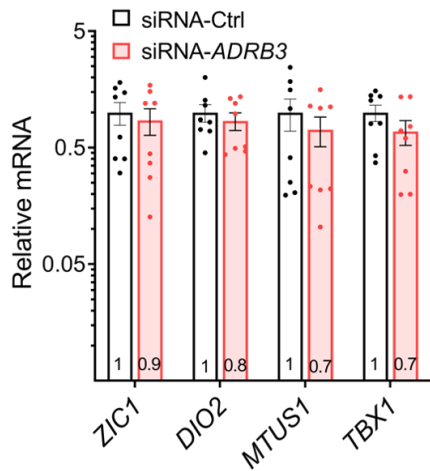

**B**

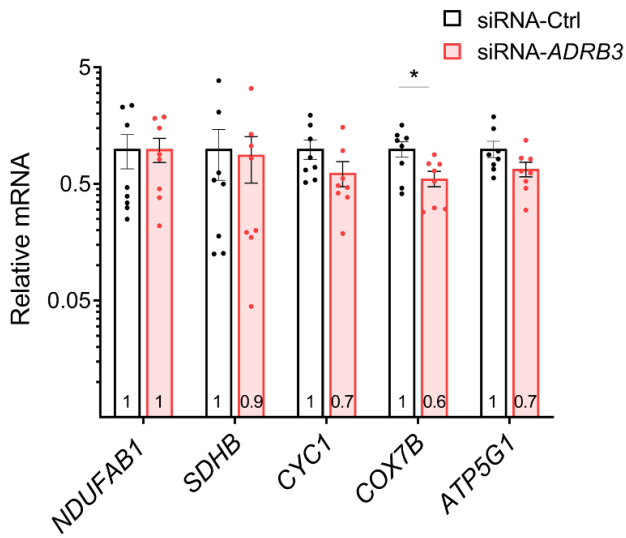

**C**

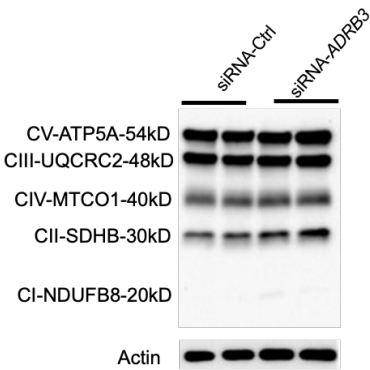

**Supplemental Figure 4. Activation of all three beta-adrenergic subtypes in primary human brown/beige adipocytes stimulates lipolysis and can be suppressed by pre-treatment of the  $\beta_3$ -AR antagonist L-748,337.**

A

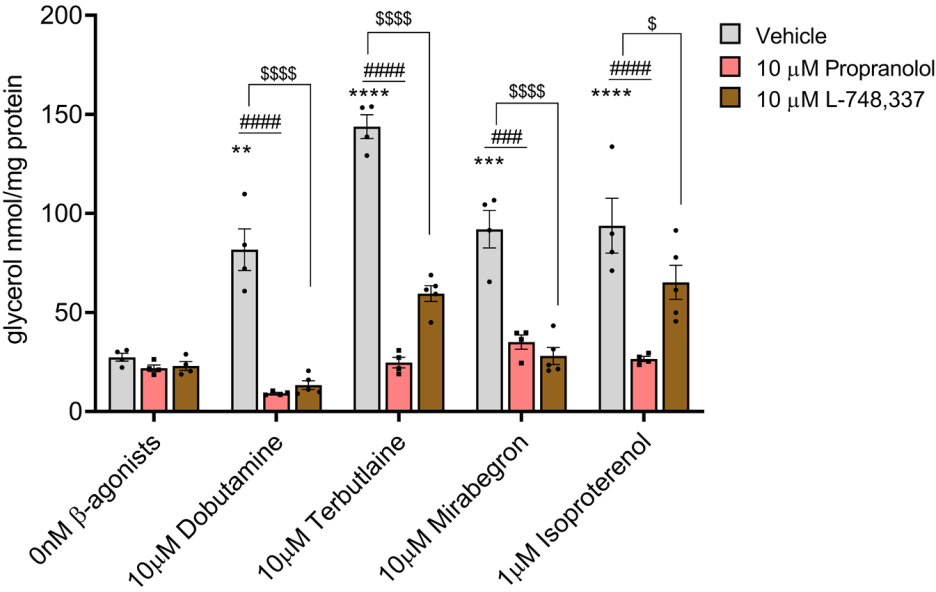



**Supplemental Figure 5. Silencing *ADRB3* in mature brown/beige adipocytes lowers non-mitochondrial respiration.**

**A**

Non Mitochondrial Respiration

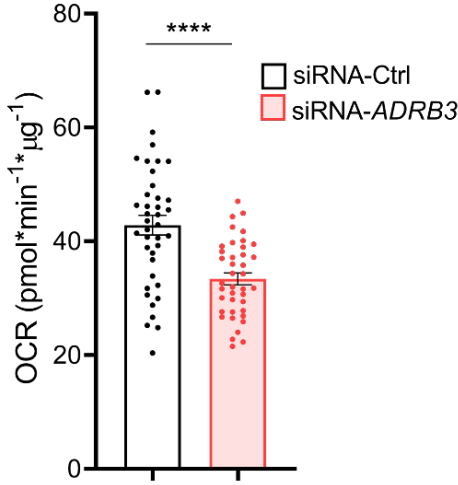

**B**

Non Mitochondrial Respiration

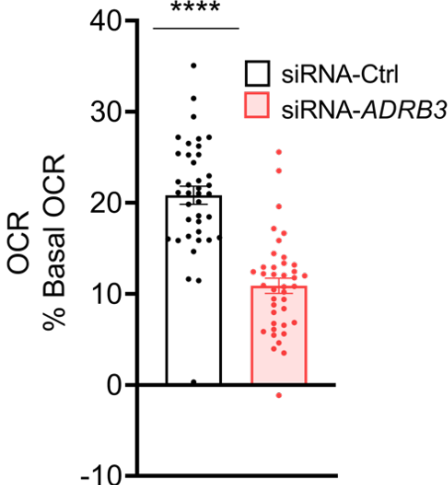

**C**

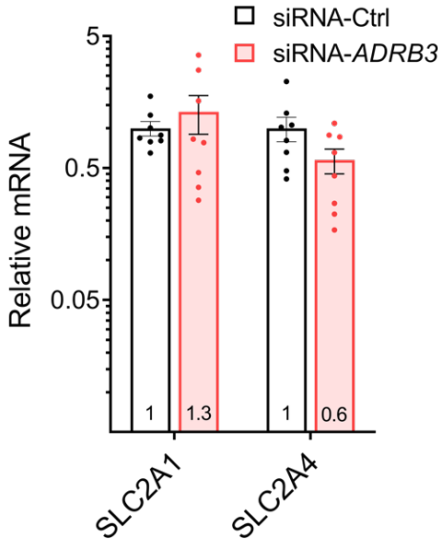

**Supplemental Figure 6. Phenotype of immortalized human brown/beige adipocytes.**

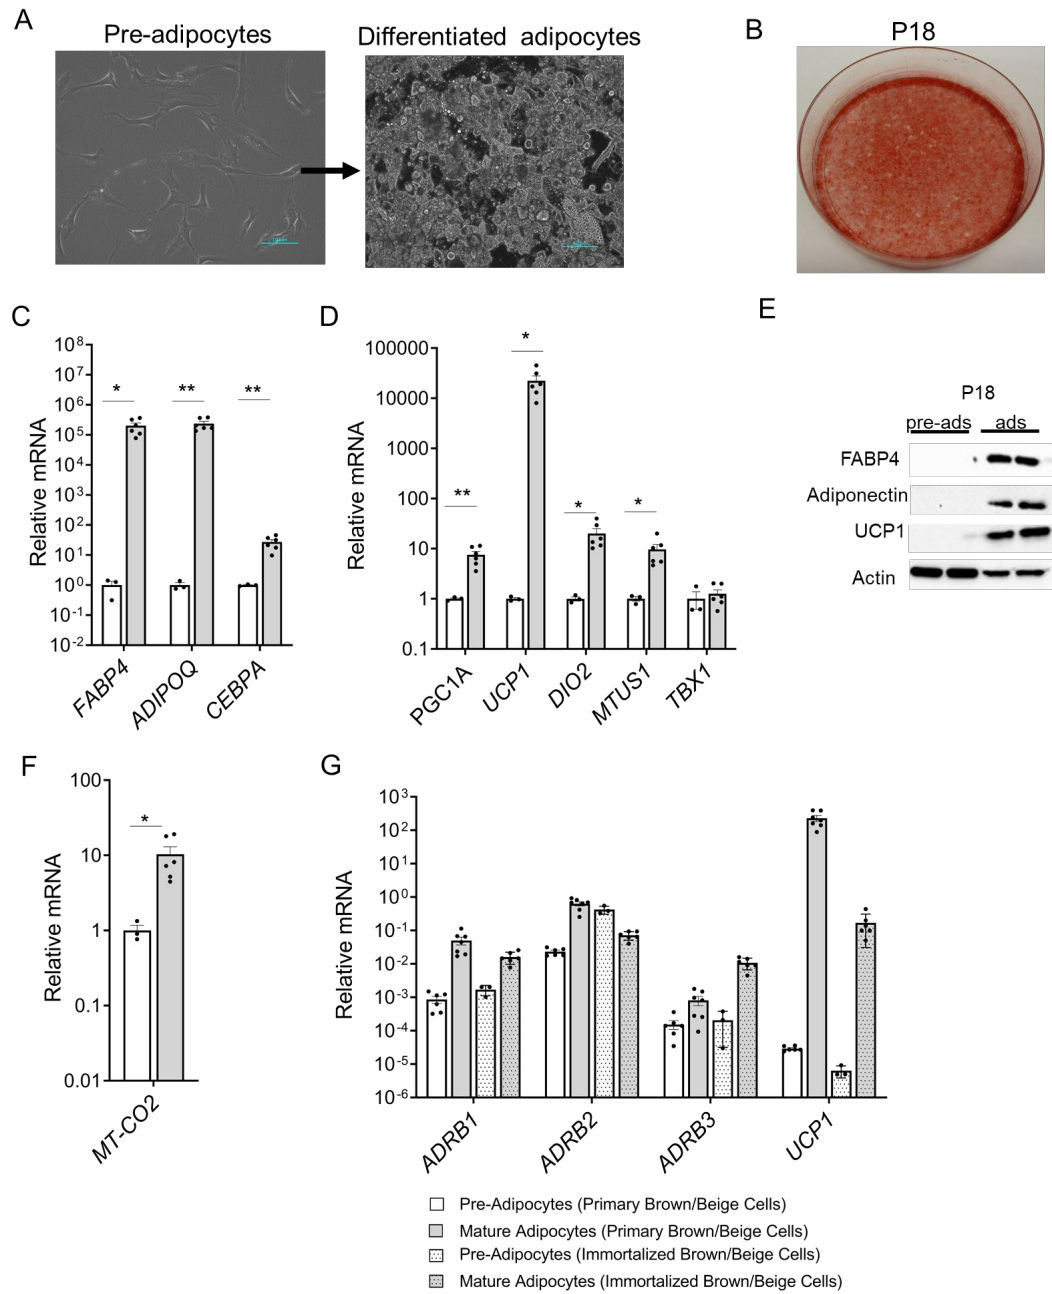

**Supplemental Figure 7. Silencing *ADRB3* in immortalized human brown adipocytes lowers the cellular lipogenic and thermogenic machinery.**

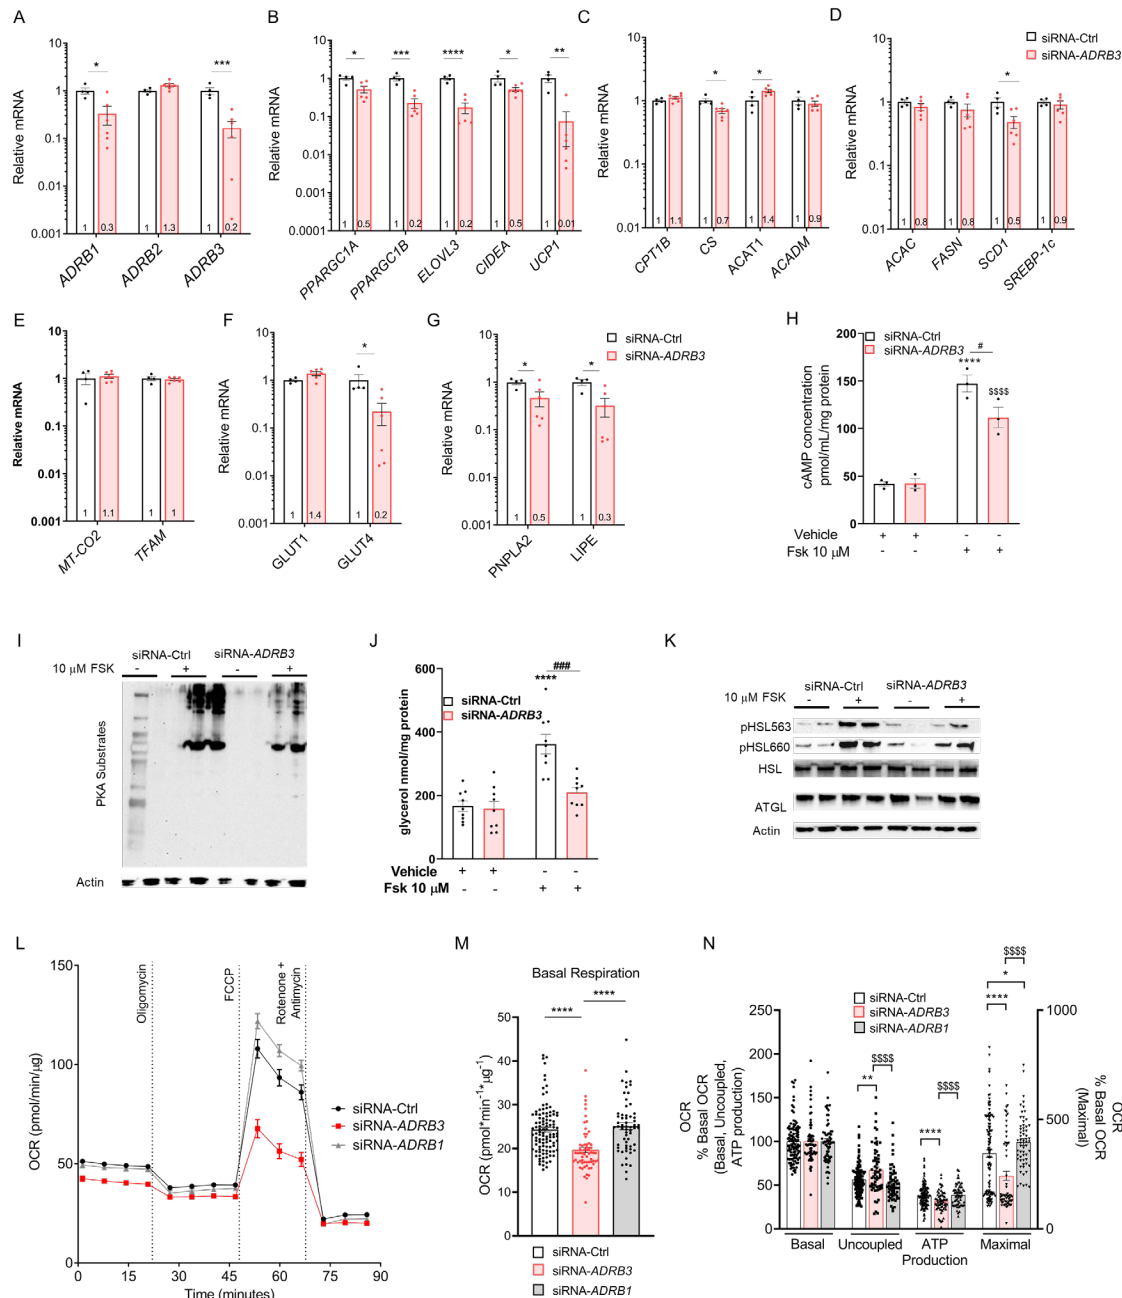

**Supplemental Table 1. List of genes and sequences of the primers used for RT-PCR gene expression analysis.**

| Gene     | Prime     | Primer Sequence                           |
|----------|-----------|-------------------------------------------|
| TBP      | sense     | 5'-CCC GAA ACG CCG AAT ATA A-3'           |
|          | antisense | 5'-GAA AAT CAG TGC CGT GGT TC-3'          |
| ACTIN    | sense     | 5'-GAG CTA CGA GCT GCC TGA CG-3'          |
|          | antisense | 5'-GTA GTT TCG TGG ATG CCA CAG-3'         |
| ADIPOQ   | sense     | 5'-CCT GGT GAG AAG GGT GAG AA-3'          |
|          | antisense | 5'-GTA AAG CGA ATG GGC ATG TT-3'          |
| FABP4    | sense     | 5'-CCT TTA AAA ATA CTG AGA TTT CCT TCA-3' |
|          | antisense | 5'-GGA CAC CCC CAT CTA AGG T-3'           |
| PPARGC1A | sense     | 5'-CCA CAG AGA ACA GAA ACA GCA-3'         |
|          | antisense | 5'-TGG GGT CAG AGG AAG AGA TAA-3'         |
| PPARGC1B | sense     | 5'-GAT GCC AGC GAC GAC TTT GAC TC-3'      |
|          | antisense | 5'-ACC CAC GTC ATC TTC AGG GA-3'          |
| PNPLA2   | sense     | 5'-ACC AGC ATC CAG TTC AAC CT-3'          |
|          | antisense | 5'-ATC CCTGCTTGC ACA TCT CT-3'            |
| LIPE     | sense     | 5'-CTC AGT GTG CTC TCC AAG TG-3'          |
|          | antisense | 5'-CAC CCA GGC GGA AGT CTC-3'             |
| ABHD5    | sense     | 5'-GAG GTT TTT CTT AGG TGC TGG-3'         |
|          | antisense | 5'-TGT CAG GGT GCA TTT TAC CA-3'          |
| CEBPA    | sense     | 5'-AAG AAG TCG GTG GAC AAG AAC-3'         |
|          | antisense | 5'-GTC ATT GTC ACT GGT CAG CTC-3'         |
| UCP1     | sense     | 5'-CCA ACT GTG CAA TGA AAG TGT-3'         |
|          | antisense | 5'-CAA GTC GCA AGA AGG AAG GTA-3'         |
| MT-CO2   | sense     | 5'-AGT CCT GTA TGC CCT TTT CCT-3'         |
|          | antisense | 5'-TTC AGA CGG TTT CTA TTT CCT G-3'       |
| CPT1B    | sense     | 5'-CTC CTT TCC TTG CTG AGG TG-3'          |
|          | antisense | 5'-TCT CGC CTG CAA TCA TGT AG-3'          |
| CS       | sense     | 5'-GGA CAT ATC CCA ACA GAG GAA-3'         |
|          | antisense | 5'-CTC TTT GCC CAC TCT TTT GAG-3'         |
| ADRB1    | sense     | 5'-CTC CTT CTT CTG CGA GCT GT-3'          |
|          | antisense | 5'-AGG ATG GGC AGG AAG GAC-3'             |
| ADRB2    | sense     | 5'-CTT CTT GCC CAT TCA GAT GC-3'          |
|          | antisense | 5'-AAG AAG TCA CAG CAG GTC TC-3'          |
| ADRB3    | sense     | 5'-TTT GCC AAC GGC TCG AC-3'              |
|          | antisense | 5'-CGT CAG GTT CTG GAG GGT AG-3'          |
| ZIC1     | sense     | 5'-CAA ACA CAT GAA GGT CCA CG-3'          |
|          | antisense | 5'-ATA AGG AGC TTG TGG TCG G-3'           |
| DIO-2    | sense     | 5'-CCT CCT CGA TGC CTA CAA AC-3'          |
|          | antisense | 5'-GCT GGC AAA GTC AAG AAG GT-3'          |
| MTUS1    | sense     | 5'-TGA GGC AAA TAG CTG CTC CA-3'          |
|          | antisense | 5'-TGA GGA GAT ACG GCT CGA TCA-3'         |
| TMEM26   | sense     | 5'-ATG GAG GGA CTG GTC TTC CTT-3'         |
|          | antisense | 5'-CTT CAC CTC GGT CAC TCG C-3'           |
| TBX1     | sense     | 5'-ACG ACA ACG GCC ACA TTA TTC-3'         |
|          | antisense | 5'-CCT CGG CAT ATT TCT CGC TAT CT-3'      |
| PRDM16   | sense     | 5'-CAC GAG TGC AAG GAC TGC-3'             |
|          | antisense | 5'-TGT GGA TGA CCA TGT GCT G-3'           |
| ACAT1    | sense     | 5'-CCT GAG GAA GAT GAA GAC C-3'           |
|          | antisense | 5'-CTC TGC CTC TGC TGT CAA C-3'           |
| ACADM    | sense     | 5'-TTG AGT TCA CCG AAC AGC AG-3'          |
|          | antisense | 5'-AGG GGG ACT GGA TAT TCA CC-3'          |
| GLUT1    | sense     | 5'-CTG CTC ATC AAC CGC AAC-3'             |
|          | antisense | 5'-CTT CTT CTC CCG CAT CAT CT-3'          |
| GLUT4    | sense     | 5'-TGG GCT TCT TCA TCT TCA CC-3'          |
|          | antisense | 5'-GTG CTG GGT TTC ACC TCC T-3'           |
| NDUFAB1  | sense     | 5'-CGT CTC GTC GTC CTT TCA GC-3'          |
|          | antisense | 5'-CCT GGA TGC CCT CTA ACG-3'             |
| SDHB     | sense     | 5'-GGA GAG CGA CCT CGG GGT T-3'           |
|          | antisense | 5'-GTC TCT GTG GCT TTC CTG ACT-3'         |
| CYC1     | sense     | 5'-GTC GTC GAA GTC TGG CCT TT-3'          |
|          | antisense | 5'-CAC GGT GAG ACC ACG GAT AG-3'          |
| COX7B    | sense     | 5'-AGC GAA TTG GCA CCA AAG CAG CA-3'      |
|          | antisense | 5'-CTG GTG GCT CTG CCT TGC CAT-3'         |
| ATP5G1   | sense     | 5'-CTA AAC AGC CTT CCT ACA GCA ACT T-3'   |
|          | antisense | 5'-TGA ACC AGC CAC ACC AAC TGT-3'         |
| ACAC     | sense     | 5'-GAG AAC TGC CCT TTC TGC AC-3'          |
|          | antisense | 5'-CCA AGC TCC AGG CTT CAT AG-3'          |
| FASN     | sense     | 5'-ACT GGA GGG GAC AGT GCA T-3'           |
|          | antisense | 5'-GCA GCG CTG TTT ACA CTC CT-3'          |
| SCD1     | sense     | 5'-CAC CAC ATT CTT CAT TGA TTG CA-3'      |
|          | antisense | 5'-ATG GCG GCC TTG GAG ACT-3'             |
| SREBP-1c | sense     | 5'-GGC TCC TGC CTA CAG CTT CT-3'          |
|          | antisense | 5'-CAG CCA GTG GAT CAC CAC A-3'           |
| PGC1B    | sense     | 5'-GAT GCC AGC GAC TTT GAC TC-3'          |
|          | antisense | 5'-ACC CAC GTC ATC TTC AGG GA-3'          |
| ELOVL3   | sense     | 5'-CTG TTC CAG CCC TAT AAC TTC G-3'       |
|          | antisense | 5'-GAA TGA GGT TGC CCA ATA CTC C-3'       |
| CIDEA    | sense     | 5'-ACT CTG GAT GCC CTC GTC AT-3'          |
|          | antisense | 5'-ACT CTT CTG TGT CCA CCA CG-3'          |
| TFAM     | sense     | 5'-AGC TCA GAA CCC AGA TGC-3'             |
|          | antisense | 5'-CCA CTC CGC CCT ATA AGC-3'             |

**Supplemental Table 2. Ct values of genes investigated in the main figures 1, 2 and 5.**

| CT Values of Genes Figure 1 |            |        |             |        |
|-----------------------------|------------|--------|-------------|--------|
| Gene                        | siRNA-Ctrl |        | siRNA-ADRB3 |        |
|                             | average    | st.dev | average     | st.dev |
| <b>TBP</b>                  | 24.6       | ± 0.3  | 24.4        | ± 0.2  |
| <b>ADRB1</b>                | 26.4       | ± 0.7  | 28.2        | ± 0.9  |
| <b>ADRB2</b>                | 27.4       | ± 0.24 | 27.7        | ± 0.3  |
| <b>ADRB3</b>                | 29.7       | ± 0.4  | 35.1        | ± 1.0  |
|                             |            |        |             |        |
| <b>PGC1A</b>                | 24.1       | ± 0.5  | 24.8        | ± 0.2  |
| <b>PGC1B</b>                | 25.3       | ± 0.4  | 26.2        | ± 0.3  |
| <b>ELOVL3</b>               | 24.7       | ± 0.7  | 26.0        | ± 0.5  |
| <b>CIDEA</b>                | 27.0       | ± 0.1  | 27.3        | ± 0.2  |
| <b>UCP1</b>                 | 21.4       | ± 0.7  | 24.4        | ± 0.5  |
|                             |            |        |             |        |
| <b>MT-CO2</b>               | 13.4       | ± 0.3  | 13.7        | ± 0.1  |
| <b>TFAM</b>                 | 22.5       | ± 0.3  | 23.5        | ± 0.2  |
|                             |            |        |             |        |
| <b>CPT1B</b>                | 22.0       | ± 0.5  | 23.4        | ± 0.3  |
| <b>CS</b>                   | 20.7       | ± 0.3  | 21.1        | ± 0.2  |
| <b>ACAT1</b>                | 21.6       | ± 0.3  | 22.0        | ± 0.4  |
| <b>ACADM</b>                | 21.9       | ± 0.4  | 22.2        | ± 0.3  |
|                             |            |        |             |        |
| <b>ACAC</b>                 | 21.4       | ± 0.3  | 24.4        | ± 0.2  |
| <b>FASN</b>                 | 21.4       | ± 0.5  | 24.4        | ± 0.4  |
| <b>SCD1</b>                 | 21.4       | ± 0.3  | 24.4        | ± 0.3  |
| <b>SERBP1C</b>              | 21.4       | ± 0.4  | 24.4        | ± 0.3  |
|                             |            |        |             |        |
| <b>CMKT1</b>                | 22.5       | ± 0.2  | 23.3        | ± 0.2  |
| <b>CMKT2</b>                | 24.1       | ± 0.4  | 25.0        | ± 0.4  |

| CT Values of Genes expressed in Figure 2 |            |        |             |        |
|------------------------------------------|------------|--------|-------------|--------|
| Gene                                     | siRNA-Ctrl |        | siRNA-ADRB3 |        |
|                                          | average    | st.dev | average     | st.dev |
| <b>PNPLA2</b>                            | 17.7       | ± 0.5  | 17.9        | ± 0.4  |
| <b>LIPE</b>                              | 19.8       | ± 0.4  | 20.1        | ± 0.3  |
| <b>ABHD5</b>                             | 24.8       | ± 0.4  | 25.3        | ± 0.4  |

| CT Values of Genes Figure 5 |            |        |             |        |
|-----------------------------|------------|--------|-------------|--------|
| Gene                        | siRNA-Ctrl |        | siRNA-ADRB1 |        |
|                             | average    | st.dev | average     | st.dev |
| <b>TBP</b>                  | 24.0       | ± 0.2  | 24.2        | ± 0.1  |
| <b>ADRB1</b>                | 24.5       | ± 0.1  | 28.8        | ± 0.2  |
| <b>ADRB2</b>                | 27.2       | ± 0.5  | 27.3        | ± 0.2  |
| <b>ADRB3</b>                | 29.1       | ± 0.5  | 30.8        | ± 0.5  |
|                             |            |        |             |        |
| <b>PGC1A</b>                | 22.9       | ± 0.1  | 23.3        | ± 0.1  |
| <b>PGC1B</b>                | 24.3       | ± 0.1  | 24.7        | ± 0.1  |
| <b>ELOVL3</b>               | 23.0       | ± 0.4  | 24.0        | 0.1    |
| <b>CIDEA</b>                | 26.9       | ± 0.1  | 27.5        | ± 0.2  |
| <b>UCP1</b>                 | 19.8       | ± 0.3  | 22.5        | ± 0.5  |
|                             |            |        |             |        |
| <b>MT-CO2</b>               | 12.7       | ± 0.3  | 12.9        | ± 0.2  |
| <b>TFAM</b>                 | 22.0       | ± 0.2  | 22.4        | ± 0.2  |
|                             |            |        |             |        |
| <b>CPT1B</b>                | 20.9       | ± 0.2  | 22.2        | ± 0.2  |
| <b>CS</b>                   | 20.1       | ± 0.1  | 20.6        | ± 0.2  |
| <b>ACAT1</b>                | 20.90138   | ± 0.1  | 21.0735     | 0.2    |
| <b>ACADM</b>                | 20.87487   | ± 0.01 | 21.06175    | 0.2    |
|                             |            |        |             |        |
| <b>ACAC</b>                 | 20.5       | ± 0.2  | 21.9        | ± 0.2  |
| <b>FASN</b>                 | 18.4       | ± 0.2  | 19.5        | ± 0.2  |
| <b>SCD1</b>                 | 14.0       | ± 0.2  | 14.9        | ± 0.2  |
| <b>SERBP1C</b>              | 20.3       | ± 0.1  | 21.1        | ± 0.3  |
|                             |            |        |             |        |
| <b>GLUT1</b>                | 21.5       | ± 0.2  | 21.5        | ± 0.3  |
| <b>GLUT4</b>                | 21.3       | ± 0.2  | 22.9        | ± 0.4  |
|                             |            |        |             |        |
| <b>PNPLA2</b>               | 16.4       | ± 0.2  | 17.2        | ± 0.1  |
| <b>LIPE</b>                 | 18.8       | ± 0.04 | 19.6        | ± 0.2  |
| <b>ABHD5</b>                | 24.1       | ± 0.2  | 24.4        | ± 0.4  |
|                             |            |        |             |        |
| <b>NDUFAB1</b>              | 21.5       | ± 0.8  | 21.9        | ± 1    |
| <b>SDHB</b>                 | 31.0       | ± 0.6  | 30.5        | ± 0.5  |
| <b>CYC1</b>                 | 21.8       | ± 0.3  | 22.7        | ± 0.3  |
| <b>COX7B</b>                | 18.3       | ± 0.2  | 18.7        | ± 0.2  |
| <b>ATP5G1</b>               | 22.6       | ± 0.1  | 23.5        | ± 0.3  |

**Supplemental Table 3. Ct values of genes investigated in the supplemental figure 1.**

| <b>CT Values of Genes Extended Figure 1 (Tissue)</b> |                      |        |                     |          |
|------------------------------------------------------|----------------------|--------|---------------------|----------|
| Gene                                                 | Superficial neck fat |        | supraclavicular fat |          |
|                                                      | average              | st.dev | average             | st.dev   |
| <i>ACT1N</i>                                         | 20.0                 | ± 0.1  | 21.2                | ± 0.03   |
| <i>UCP1</i>                                          | 41.0                 | ± 0    | 35.4                | ± 1      |
| <i>ADRB1</i>                                         | 30.5                 | ± 0.3  | 30.4                | ± 0.03   |
| <i>ADRB2</i>                                         | 26.4                 | ± 0.1  | 27.8                | ± 0.06   |
| <i>ADRB3</i>                                         | 31.8                 | ± 0.2  | 29.9                | ± 0.0658 |
| <i>PGC1A</i>                                         | 29.8                 | ± 0.1  | 27.3                | ± 0.02   |
| <i>CEBPA</i>                                         | 29.1                 | ± 0.1  | 30.8                | ± 0.06   |
| <i>PRDM16</i>                                        | 28.6                 | ± 0.4  | 27.9                | ± 0.01   |
| <i>ZIC1</i>                                          | 29.6                 | ± 0.8  | 30.2                | ± 0.02   |
| <i>MTUS1</i>                                         | 28.5                 | ± 0.1  | 29.1                | ± 0.6    |
| <i>TBX1</i>                                          | 28.1                 | ± 0.01 | 27.0                | ± 0.06   |
| <i>TMEM26</i>                                        | 28.5                 | ± 0.6  | 30.7                | ± 0.09   |

| <b>CT Values of Genes Extended Figure 1 (Differentiation Process of SCLV derived brown/beige primary adipocytes)</b> |         |        |         |        |         |        |         |        |         |        |         |        |
|----------------------------------------------------------------------------------------------------------------------|---------|--------|---------|--------|---------|--------|---------|--------|---------|--------|---------|--------|
| Gene                                                                                                                 | d0      |        | d5      |        | d10     |        | d15     |        | d20     |        | d22     |        |
|                                                                                                                      | average | st.dev | average | st.dev | average | st.dev | average | st.dev | average | st.dev | average | st.dev |
| <i>TBP</i>                                                                                                           | 25.1    | ± 0.1  | 25.0    | ± 0.05 | 24.3    | ± 0.1  | 24.2    | ± 0.1  | 25.2    | ± 0.2  | 25.1    | ± 0.2  |
| <i>PGC1A</i>                                                                                                         | 30.2    | ± 0.5  | 24.5    | ± 0.5  | 21.3    | ± 0.2  | 21.8    | ± 0.2  | 23.2    | ± 0.3  | 23.3    | ± 0.3  |
| <i>UCP1</i>                                                                                                          | 41.0    | ± 0    | 26.8    | ± 0.9  | 19.9    | ± 0.1  | 20.3    | ± 0.3  | 23.2    | ± 0.4  | 24.4    | ± 0.3  |
| <i>MT-CO2</i>                                                                                                        | 15.0    | ± 0.2  | 14.3    | ± 0.2  | 12.8    | ± 0.1  | 12.6    | ± 0.4  | 12.7    | ± 0.3  | 13.3    | ± 0.3  |

| <b>CT Values of Genes Extended Figure 1 (pre- and mature- adipocytes)</b> |                |        |                   |        |
|---------------------------------------------------------------------------|----------------|--------|-------------------|--------|
| Gene                                                                      | pre-adipocytes |        | mature adipocytes |        |
|                                                                           | average        | st.dev | average           | st.dev |
| <i>TBP</i>                                                                | 25.9           | ± 0.1  | 24.6              | ± 0.3  |
| <i>FABP4</i>                                                              | 30.4           | ± 0.1  | 13.2              | ± 0.2  |
| <i>ADIPOQ</i>                                                             | 39.5           | ± 0.7  | 14.2              | ± 0.4  |
| <i>CEBPA</i>                                                              | 29.3           | ± 0.1  | 20.9              | ± 0.2  |
| <i>PGC1a</i>                                                              | 31.2           | ± 0.2  | 22.9              | ± 0.4  |
| <i>PRDM16</i>                                                             | 26.9           | ± 0.3  | 27.4              | ± 0.4  |
| <i>UCP1</i>                                                               | 41.0           | ± 0    | 16.9              | ± 0.3  |
| <i>ZIC1</i>                                                               | 31.6           | ± 0.4  | 30.4              | ± 1.0  |
| <i>DIO2</i>                                                               | 31.8           | ± 0.2  | 23.8              | ± 1.0  |
| <i>MTUS1</i>                                                              | 30.8           | ± 0.1  | 27.1              | ± 0.5  |
| <i>TBX1</i>                                                               | 25.6           | ± 0.1  | 25.5              | ± 0.3  |
| <i>TMEM26</i>                                                             | 31.3           | ± 0.3  | 32.4              | ± 0.7  |
| <i>CPT1</i>                                                               | 26.6           | ± 0.1  | 21.6              | ± 0.4  |
| <i>CS</i>                                                                 | 23.1           | ± 0.1  | 18.8              | ± 0.5  |
| <i>ADRB1</i>                                                              | 36.4           | ± 0.4  | 29.2              | ± 0.6  |
| <i>ADRB2</i>                                                              | 31.4           | ± 0.1  | 25.4              | ± 0.3  |
| <i>ADRB3</i>                                                              | 38.9           | ± 0.5  | 35.4              | ± 0.5  |

**Supplemental Table 4. Ct values of genes investigated in the supplemental figures 2,4 and 5.**

| CT Values of Genes expressed in Extended Figure 2 |            |        |             |        |
|---------------------------------------------------|------------|--------|-------------|--------|
| Gene                                              | siRNA-Ctrl |        | siRNA-ADRB3 |        |
|                                                   | average    | st.dev | average     | st.dev |
| <i>NDUFAB1</i>                                    | 22.4       | ± 0.6  | 22.0        | ± 0.4  |
| <i>SDHB</i>                                       | 30.3       | ± 0.4  | 30.3        | ± 0.6  |
| <i>CYC1</i>                                       | 22.3       | ± 0.3  | 22.9        | ± 0.2  |
| <i>COX7B</i>                                      | 19.5       | ± 0.5  | 20.2        | ± 0.3  |
| <i>ATP5G1</i>                                     | 23.1       | ± 0.2  | 23.5        | ± 0.2  |
|                                                   |            |        |             |        |
| <i>ZIC1</i>                                       | 21.4       | ± 0.2  | 24.4        | ± 0.4  |
| <i>DIO-2</i>                                      | 24.9       | ± 0.2  | 24.9        | ± 0.3  |
| <i>MTUS1</i>                                      | 28.2       | ± 0.3  | 28.4        | ± 0.4  |
| <i>TBX1</i>                                       | 24.2       | ± 0.5  | 24.7        | ± 0.5  |
|                                                   |            |        |             |        |
| <i>GLUT1</i>                                      | 22.1       | ± 0.2  | 21.9        | ± 0.6  |
| <i>GLUT4</i>                                      | 22.6       | ± 0.5  | 23.3        | ± 0.3  |

| CT Values of Genes Extended Figure 4 (pre-mature adipocytes) |                |        |                   |        |
|--------------------------------------------------------------|----------------|--------|-------------------|--------|
| Gene                                                         | pre-adipocytes |        | mature adipocytes |        |
|                                                              | average        | st.dev | average           | st.dev |
| <i>TBP</i>                                                   | 23.7           | ± 0.39 | 24.5              | ± 0.1  |
| <i>FABP4</i>                                                 | 32.3           | ± 0.8  | 15.3              | ± 0.1  |
| <i>ADIPOQ</i>                                                | 35.0           | ± 0.2  | 17.9              | ± 0.1  |
| <i>CEBPA</i>                                                 | 29.1           | ± 0.1  | 25.1              | ± 0.2  |
|                                                              |                |        |                   |        |
| <i>PGC1A</i>                                                 | 26.1           | ± 0.1  | 23.9              | ± 0.2  |
| <i>UCP1</i>                                                  | 41.0           | ± 0    | 27.4              | ± 0.4  |
| <i>DIO2</i>                                                  | 30.3           | ± 0.2  | 26.8              | ± 0.1  |
| <i>MTUS1</i>                                                 | 29.9           | ± 0.2  | 27.4              | ± 0.1  |
| <i>TBX1</i>                                                  | 35.0           | ± 0.6  | 35.3              | ± 0.3  |
|                                                              |                |        |                   |        |
| <i>CPT1</i>                                                  | 26.5           | ± 0.2  | 23.7              | ± 1.3  |
|                                                              |                |        |                   |        |
| <i>ADRB1</i>                                                 | 33.0           | ± 0.3  | 30.6              | ± 0.2  |
| <i>ADRB2</i>                                                 | 25.0           | ± 0.1  | 28.4              | ± 0.1  |
| <i>ADRB3</i>                                                 | 36.6           | ± 1.4  | 31.2              | ± 0.2  |

| CT Values of Genes Extended Figure 4H (pre-mature adipocytes) |              |                |        |                   |        |
|---------------------------------------------------------------|--------------|----------------|--------|-------------------|--------|
|                                                               | Gene         | pre-adipocytes |        | mature adipocytes |        |
|                                                               |              | average        | st.dev | average           | st.dev |
| Primary Adipocytes                                            | <i>ADRB1</i> | 36.4           | ± 0.4  | 29.2              | ± 0.6  |
|                                                               | <i>ADRB2</i> | 31.4           | ± 0.1  | 25.4              | ± 0.3  |
|                                                               | <i>ADRB3</i> | 38.9           | ± 0.5  | 35.4              | ± 0.5  |
|                                                               | <i>UCP1</i>  | 41.0           | ± 0    | 16.9              | ± 0.3  |
| Immortalized Adipocytes                                       | Gene         | pre-adipocytes |        | mature adipocytes |        |
|                                                               | <i>ADRB1</i> | 33.0           | ± 0.3  | 30.6              | ± 0.2  |
|                                                               | <i>ADRB2</i> | 25.0           | ± 0.1  | 28.4              | ± 0.1  |
|                                                               | <i>ADRB3</i> | 36.6           | ± 1.4  | 31.2              | ± 0.2  |
|                                                               | <i>UCP1</i>  | 41.0           | ± 0    | 27.4              | ± 0.4  |

| CT Values of Genes Extended Figure 5 |            |        |             |        |
|--------------------------------------|------------|--------|-------------|--------|
| Gene                                 | siRNA-Ctrl |        | siRNA-ADRB3 |        |
|                                      | average    | st.dev | average     | st.dev |
| <i>TBP</i>                           | 24.4       | ± 0.4  | 24.1        | ± 0.1  |
| <i>ADRB1</i>                         | 28.1       | ± 0.3  | 30.9        | ± 0.6  |
| <i>ADRB2</i>                         | 26.9       | ± 0.1  | 27.1        | ± 0.1  |
| <i>ADRB3</i>                         | 31.3       | ± 0.3  | 35.8        | ± 1.2  |
|                                      |            |        |             |        |
| <i>PGC1A</i>                         | 22.1       | ± 0.2  | 23.7        | ± 0.3  |
| <i>PGC1B</i>                         | 22.6       | ± 0.3  | 25.6        | ± 0.4  |
| <i>ELOVL3</i>                        | 23.4       | ± 0.1  | 26.8        | ± 0.4  |
| <i>CIDEA</i>                         | 27.2       | ± 0.2  | 28.7        | ± 0.2  |
| <i>UCP1</i>                          | 27.4       | ± 0.5  | 33.3        | ± 0.9  |
|                                      |            |        |             |        |
| <i>MT-CO2</i>                        | 12.6       | ± 0.5  | 12.8        | ± 0.2  |
| <i>TFAM</i>                          | 20.9       | ± 0.2  | 21.6        | ± 0.1  |
|                                      |            |        |             |        |
| <i>CPT1B</i>                         | 25.3       | ± 0.03 | 25.8        | ± 0.1  |
| <i>CS</i>                            | 19.8       | ± 0.2  | 20.9        | ± 0.1  |
| <i>ACAT1</i>                         | 20.9       | ± 0.2  | 20.9        | ± 0.1  |
| <i>ACADM</i>                         | 20.8       | ± 0.2  | 21.5        | ± 0.2  |
|                                      |            |        |             |        |
| <i>ACAC</i>                          | 20.4       | ± 0.2  | 21.3        | ± 0.2  |
| <i>FASN</i>                          | 20.8       | ± 0.2  | 22.0        | ± 0.3  |
| <i>SCD1</i>                          | 14.7       | ± 0.3  | 16.4        | ± 0.3  |
| <i>SERBP1C</i>                       | 22.0       | ± 0.1  | 22.8        | ± 0.2  |
|                                      |            |        |             |        |
| <i>GLUT1</i>                         | 23.5       | ± 0.2  | 23.6        | ± 0.2  |
| <i>GLUT4</i>                         | 23.7       | ± 0.5  | 27.6        | ± 0.9  |
|                                      |            |        |             |        |
| <i>PNPLA2</i>                        | 17.9       | ± 0.2  | 20.0        | ± 0.5  |
| <i>LIPE</i>                          | 21.0       | ± 0.3  | 24.0        | ± 0.7  |
